# Supplementary material for: Understanding the Dynamics of SARS-CoV-2 Variants of Concern in Ontario, Canada: A Case Study
Source: Research Square preprint supplement (doi:10.21203/rs.3.rs-788073/v1), 2021-08-12
Supplement: Supplementary file 1 [file 772098550e5ee08c98b3c651.docx]

**Table S1**. Model parameters. Infection rates are given per individual per day; other rates are given per day.

♣2018-2019 death rate in Ontario, Statistics Canada.

♦Taken to be 70% higher than actual number of deaths / cases (July 2021, Statistics Canada) per day, since only infected susceptible die at this rate.

| Symbol | Description | Values |
| --- | --- | --- |
| αW, αA, αD | Ratio of infectivity of asymptomatic and symptomatic individuals | 3.0 [1] |
| βW | Rate of symptomatic infections of susceptibles by wild type | 3.3E-9 |
| βA | Rate of symptomatic infections of susceptibles by Alpha | 5.5E-9 [2] |
| βD | Rate of symptomatic infections of susceptibles by Delta | 7.6E-9 [2] |
| βWV1,PZ | Rate of symptomatic infections of individuals vaccinated with one Pfizer dose by wild type | 0.2×βW [3, 4] |
| βWV2,PZ | Rate of symptomatic infections of individuals vaccinated with both Pfizer doses by wild type | 0.05×βW [4] |
| βAV1,PZ | Rate of symptomatic infections of individuals vaccinated with one Pfizer dose by Alpha | 0.5×βA [5] |
| βAV2,PZ | Rate of symptomatic infections of individuals vaccinated with both Pfizer doses by Alpha | 0.07×βA [5] |
| βDV1,PZ | Rate of symptomatic infections of individuals vaccinated with one Pfizer dose by Delta | 0.67×βD [6] |
| βDV2,PZ | Rate of symptomatic infections of individuals vaccinated with both Pfizer doses by Delta | 0.12×βD [6] |
| βWV1,AZ | Rate of symptomatic infections of individuals vaccinated with one AstraZeneca dose by wild type | 0.2×βW [4] |
| βWV2,AZ | Rate of symptomatic infections of individuals vaccinated with both AstraZeneca doses by wild type | 0.05×βW [4] |
| βAV1,AZ | Rate of symptomatic infections of individuals vaccinated with one AstraZeneca dose by Alpha | 0.5×βA [7] |
| βAV2,AZ | Rate of symptomatic infections of individuals vaccinated with both AstraZeneca doses by Alpha | 0.34×βA [7] |
| βDV1,AZ | Rate of symptomatic infections of individuals vaccinated with one AstraZeneca dose by Delta | 0.67×βD [6] |
| βDV2,AZ | Rate of symptomatic infections of individuals vaccinated with both AstraZeneca doses by Delta | 0.4×βD [6] |
| βXR | Rate of symptomatic infection of individual recovered from a different variant | 0.05×βX |
| γW, γA, γD | Recovery rate | 1/28 [8] |
| εPZ | Fraction of Pfizer vaccines | 0.95 |
| ηV1 | Rate of individuals with one vaccine dose losing immunity | 1/(2×365) |
| ηV2 | Rate of individuals with both vaccine doses losing immunity | 1/(8×365) |
| ηR | Rate of recovered individuals losing immunity | 1/(8×365) |
| μ | Natural death rate | 298.7♣ |
| μW | Death rate from wild-type infections | 0.001♦ |
| μA | Death rate from Alpha infections | 1.6×μW |
| μD | Death rate from Delta infections | 1.8×μW |
| μWV, μAV, μDV | Death rate of infected vaccinated individuals | 0.15×(μW,μA,μD) |
| σW,σA,σD | Fraction of asymptomatic infections | 0.5 [9] |
| σWV, σAV, σDV | Fraction of asymptomatic infections among vaccinated individuals | 0.85 |
| σWR, σAR, σDR | Fraction of asymptomatic infections among recovered individuals | 0.85 |

**Vaccination rates**. Vaccination rates follow Ontario timeline. Vaccination is assumed to begin on tvac0 = December 14 2020. Vaccination rate increases linearly until it peaks at the end of June (tvac1 = June 30 2021). Prior to the end of May (tvac2 = May 31 2021), dosing interval is Δt0 = 16 weeks. Afterwards, dosing interval is ΔtPZ = 4 weeks for Pfizer and ΔtAZ = 8 weeks for AstraZeneca.

, M = PZ, AZ

where r0 and rss are taken to be 1.1% and 0.05% of the population per day. These parameters are chosen so that at the end of July 2021, 71% of the population have received at least one dose and 57% are fully vaccinated, consistent with Ontario statistics (COVID19Tracker.ca).

**Non-pharmaceutical interventions (NPI)**. The NPI severity index (λ, shown in Fig. S1) is chosen in part based on Ontario COVID-19 lockdown timeline and Google mobility data, and in part to fit the predicted new case numbers against provincial data. Effective disease infectivity is obtained by scaling all infectivity parameters (βX’s andβXV,M’s) simultaneously.


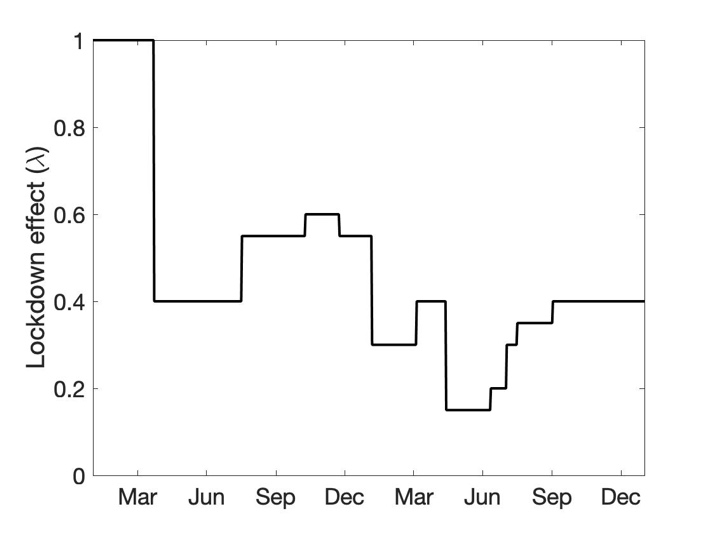


**Figure S1**. NPI index (λ) between January 1 2020 and December 31 2021.

References

1. Li, Y., et al., *Asymptomatic and symptomatic patients with non-severe coronavirus disease (COVID-19) have similar clinical features and virological courses: a retrospective single center study.* Frontiers in microbiology, 2020. **11**: p. 1570.

2. *Updates on COVID-19 Variants of Concern*. 2021, National Collaborating Ccentre for Infectious Diseases.

3. Thompson, M.G., et al., *Interim estimates of vaccine effectiveness of BNT162b2 and mRNA-1273 COVID-19 vaccines in preventing SARS-CoV-2 infection among health care personnel, first responders, and other essential and frontline workers—eight US locations, December 2020–March 2021.* Morbidity and Mortality Weekly Report, 2021. **70**(13): p. 495.

4. Bernal, J.L., et al., *Effectiveness of the Pfizer-BioNTech and Oxford-AstraZeneca vaccines on covid-19 related symptoms, hospital admissions, and mortality in older adults in England: test negative case-control study.* bmj, 2021. **373**.

5. Hall, V.J., et al., *Effectiveness of BNT162b2 mRNA vaccine against infection and COVID-19 vaccine coverage in healthcare workers in England, multicentre prospective cohort study (the SIREN Study).* 2021.

6. (WHO), W.H.O., *COVID-19 weekly epidemiological update*. 2021.

7. Emary, K.R., et al., *Efficacy of ChAdOx1 nCoV-19 (AZD1222) vaccine against SARS-CoV-2 variant of concern 202012/01 (B. 1.1. 7): an exploratory analysis of a randomised controlled trial.* The Lancet, 2021. **397**(10282): p. 1351-1362.

8. Barman, M.P., et al., *COVID-19 pandemic and its recovery time of patients in India: A pilot study.* Diabetes & Metabolic Syndrome: Clinical Research & Reviews, 2020. **14**(5): p. 1205-1211.

9. Oran, D.P. and E.J. Topol, *The proportion of SARS-CoV-2 infections that are asymptomatic: a systematic review.* Annals of internal medicine, 2021. **174**(5): p. 655-662.
